# Supplementary material
Source: PubMed Central journal article supplement (PMC8096221)
Supplement: ciaa1130_suppl_supplementary_appendix.pdf [file ciaa1130_suppl_supplementary_appendix.pdf]

# The first 100 days of SARS-CoV-2 control in Vietnam

Pham Quang Thai<sup>1,2</sup>, MD, Maia A Rabaa<sup>3,4</sup>, PhD, Duong Huy Luong<sup>5</sup>, MD, Dang Quang Tan<sup>6</sup>, MD, Tran Dai Quang<sup>6</sup>, MD, Ha-Linh Quach<sup>1,7</sup>, MSc, Ngoc-Anh Hoang Thi<sup>1,7</sup>, Phung Cong Dinh<sup>8</sup>, Ngu Duy Nghia<sup>1</sup>, MD, Tran Anh Tu<sup>1</sup>, MD, La Ngoc Quang<sup>9</sup>, MD, Tran My Phuc<sup>4</sup>, MBA, Vinh Chau<sup>4</sup>, MSc, Nguyen Cong Khanh<sup>1</sup>, MD, Dang Duc Anh<sup>1,\*</sup>, MD, Tran Nhu Duong<sup>1</sup>, MD, Guy Thwaites<sup>3,4</sup>, MD, H Rogier van Doorn<sup>3,4</sup>, MD, Marc Choisy<sup>3,4</sup>, PhD, OUCRU COVID-19 Research Group†

<sup>1</sup>National Institute of Hygiene and Epidemiology, Vietnam

<sup>2</sup>School of Preventive Medicine and Public Health, Hanoi Medical University, Vietnam

<sup>3</sup>Centre for Tropical Medicine and Global Health, Nuffield Department of Medicine, University of Oxford, UK

<sup>4</sup>Oxford University Clinical Research Unit, Vietnam

<sup>5</sup>Medical Services Administration, Ministry of Health, Vietnam

<sup>6</sup>General Department of Preventive Medicine, Ministry of Health, Vietnam

<sup>7</sup>Research School of Population Health, Australian National University, Australia

<sup>8</sup>National Agency for Science and Technology Information, Ministry of Science and Technology, Vietnam

<sup>9</sup>Hanoi University of Public Health, Vietnam

†Members listed in the acknowledgments

\***Corresponding author:** Professor Dang Duc Anh, Director, National Institute of Hygiene and Epidemiology, Hanoi, Vietnam. [dda@nihe.org.vn](mailto:dda@nihe.org.vn)

| Contents                                       | Page |
|------------------------------------------------|------|
| 1 Data.....                                    | 2    |
| 1.1 Apple Maps Mobility Trends Reports.....    | 2    |
| 1.2 Google Community Mobility Reports.....     | 2    |
| 2 Methods.....                                 | 2    |
| 2.1 Origins of infection.....                  | 2    |
| 2.2 Serial intervals.....                      | 3    |
| 2.3 Estimation of the reproduction number..... | 3    |
| 2.4 R packages used in the analysis.....       | 3    |
| 3 Results.....                                 | 3    |
| Table S1.....                                  | 4-9  |
| Table S2.....                                  | 10   |
| Table S3.....                                  | 10   |
| Table S4.....                                  | 10   |
| 4 References.....                              | 10   |

## 1 Data

### 1.1 Apple Maps Mobility Trends Reports

These data have been made available (<https://www.apple.com/covid19/mobility>) temporarily only, for the specific purpose of helping fighting against COVID-19<sup>1</sup>. Reports are published daily and reflect requests for directions in Apple Maps. This data is generated by counting the number of requests made to Apple Maps for directions, when moving by car or on foot. Data that is sent from users' devices to the Maps service is associated with random, rotating identifiers so Apple doesn't have a profile of the user's movements and searches. The data show a relative volume of directions requests in Vietnam compared to a baseline volume on January 13<sup>th</sup>, 2020. Day are defined midnight-to-midnight, UTC-8. Relative volume varies from week to week, consistent with normal, seasonal usage of Apple Maps (e.g. the lunar New Year holiday). Day of week effects (week-end versus week days) are thus important to normalize when reading these data. Data that is sent from users' devices to the Maps service is associated with random, rotating identifiers so Apple doesn't have a profile of individual movements and searches. Apple Maps has no demographic information about our users, so we can't make any statements about the representativeness of usage against the overall population.

### 1.2 Google Community Mobility Reports

These data have been made available (<https://www.google.com/covid19/mobility>) temporarily only, for the specific purpose of helping fighting against COVID-19<sup>2</sup>. These reports aim to provide insights into what has changed in response to policies aimed at combating COVID-19. The reports chart movement trends over time, across different categories of places such as **retail and recreation** (restaurants, cafes, shopping centers, theme parks, museums, libraries, and movie theaters), **groceries and pharmacies** (grocery markets, food warehouses, farmers markets, specialty food shops, drug stores, and pharmacies), **parks** (local parks, national parks, public beaches, marinas, dog parks, plazas, and public gardens), **transit stations** (public transport hubs such as subway, bus, and train stations), **workplaces**, and **residential**. No personally identifiable information, such as an individual's location, contacts or movement, is made available at any point. Insights in these reports are created with aggregated, anonymized sets of data from users who have turned on the Location History setting, which is off by default. Artificial noise is also added in order to prevent the identification of any individual person. The baseline is the median value, for the corresponding day of the week, during the 5-week period Jan 3<sup>rd</sup> – Feb 6<sup>th</sup>, 2020.

## 2 Methods

### 2.1 Origins of infection

Imported cases (noted G0 in the text) are all those who came back from an international trip. Among them, some were positive upon arrival, others became positive during the quarantine upon arrival and, before the systematic quarantine was put in place on March 21<sup>st</sup>, some others became sick and positive at home, in absence of any community transmission documented around them. All the cases who did not come back from an international trip were declared community-acquired. Among them, contact tracing allowed to

distinguish those (that we called G1) having been into contact with a G0 from the other ones (that we called G2+).

## 2.2 Serial intervals

A normal distribution was fitted by maximum likelihood to the values of serial intervals. The parameters (mean and standard deviation) estimates and their variance-covariance matrix were fed into a multinormal distribution in order to generate 10 000 Monte Carlo simulations of the serial interval distribution. We used these 10 000 simulated distributions to generate (i) the 95% confidence interval of the distribution of the serial intervals and (ii) the estimate, and its 95% confidence interval, of the proportion of distribution of the serial intervals that is below zero.

## 2.3 Estimation of the reproduction number

The reproduction number was estimated statistically from incidence data and the distribution of serial intervals as described and implemented in Cori 2019<sup>8</sup>. Essentially, the method consists in probabilistically reconstructing the transmission trees. A major advantage of the method is that it allows to compute the effective reproduction number with confidence interval of each time step chosen for the computation. A potential drawback is that it currently does not account for the fact that the distribution of the serial interval can be modified consecutively to interventions such as contact tracing.

## 2.4 R packages used in the analysis

All analyses were performed in R 4.0.0<sup>3</sup> with the following packages:

- fitdistrplus v. 1.0-14<sup>4</sup> for fitting the normal distribution to serial intervals.
- mvtnorm v. 1.1-0<sup>5</sup> for the multinormal distribution used in the Monte Carlo simulations.
- car v. 3.0-7<sup>6</sup> for the Type-II analyses of deviance in order to correct for potential confounding effects.
- incidence v. 1.7.1<sup>7</sup> to generate weekly incidence data from line listing. These weekly incidence data are then used to estimate weekly reproduction numbers.
- EpiEstim v. 2.2-1<sup>8</sup> to estimate the reproduction numbers by week.

## 3. Results

An extended version of **Table 1** is shown in **Table S1**.

**Table S1. The timing and nature of major Government-led control measures, including international border control, internal control, Ministry of Health-led communications, and enhancement of diagnostic capability.** The colors shown in the phase column indicate the intensity of control measures taken over different periods (white, initial; light yellow, early; light orange, intermediate; orange, pre-epidemic; brown, epidemic/lockdown; dark orange, post-lockdown), and correspond to the colors used in Table 1 and Figure 1 in the main text.

| <b>Control measures at international borders</b> |                   |                                                                                                                                                                                                                                                                                                                                                                                                                                                                                 |                          |
|--------------------------------------------------|-------------------|---------------------------------------------------------------------------------------------------------------------------------------------------------------------------------------------------------------------------------------------------------------------------------------------------------------------------------------------------------------------------------------------------------------------------------------------------------------------------------|--------------------------|
| <b>Phase</b>                                     | <b>Date</b>       | <b>Event</b>                                                                                                                                                                                                                                                                                                                                                                                                                                                                    | <b>Country of Origin</b> |
|                                                  | January 3, 2020   | Deputy Director of the Preventive Medicine Department (Ministry of Health), signed a letter to direct the strengthening of quarantine at border gates, prevention of epidemics and the risk of novel viruses being transmitted into Vietnam                                                                                                                                                                                                                                     |                          |
|                                                  | January 22, 2020  | Monitoring of body temperature and health status at border gates, health facilities, and in communities, especially for passengers on arrival from Wuhan City, Hubei Province, China, and the affected region; early detection, isolation and timely handling of suspected cases of disease, preventing the disease from spreading to the community; monitor of all people exposed to a case within 14 days from the last exposure                                              | China                    |
|                                                  | January 28, 2020  | Suspension of all flights from epidemic areas in China except for special cases with the consent of the Prime Minister; temporary halt issuing of tourist visas to foreigners who have been in China in the past 2 weeks, except for official duty visas in special cases. Stop entry and exit with border laissez-passers for tourism purposes; border crossings at Vietnam-China border consolidated                                                                          | China                    |
|                                                  | February 1, 2020  | All flights between Vietnam and China suspended                                                                                                                                                                                                                                                                                                                                                                                                                                 | China                    |
|                                                  | February 2, 2020  | Halting of visa issuance, 14-day mandatory quarantine for all travelers who have come from or transited through COVID-19 affected areas in China                                                                                                                                                                                                                                                                                                                                | China                    |
|                                                  | February 5, 2020  | Ban on entry from 31 affected provinces in China                                                                                                                                                                                                                                                                                                                                                                                                                                | China                    |
|                                                  | February 23, 2020 | Medical declarations required for all incoming visitors from or transiting through Korea; all flights from infected zones diverted to secondary airports outside of HCMC and Hanoi, with all individuals coming from or passing through Daegu and North Gyeongsang, South Korea isolated in a centralized isolation area for 14 days upon entry; all entrants from Republic of Korea after February 8, 2020 to be identified for medical surveillance, monitoring and isolation | Republic of Korea        |
|                                                  | February 25, 2020 | Flights from infected zones redirected to secondary airports; inform travelers that they will be placed under centralized quarantine for 14 days when entering Vietnam                                                                                                                                                                                                                                                                                                          | Republic of Korea        |
|                                                  | February 28, 2020 | Mandatory 14-day quarantine for all entering travelers                                                                                                                                                                                                                                                                                                                                                                                                                          | Korea, Iran, Italy       |
|                                                  | February 29, 2020 | Suspension of visa issuance                                                                                                                                                                                                                                                                                                                                                                                                                                                     | Republic of Korea        |
|                                                  | March 3, 2020     | Suspension of visa issuance                                                                                                                                                                                                                                                                                                                                                                                                                                                     | Italy                    |

|  |                |                                                                                                                                                                                                                                                  |                                               |
|--|----------------|--------------------------------------------------------------------------------------------------------------------------------------------------------------------------------------------------------------------------------------------------|-----------------------------------------------|
|  | March 6, 2020  | Compulsory health declarations required for all passengers from Cambodia and European Union countries (EU)                                                                                                                                       | Cambodia, EU                                  |
|  | March 7, 2020  | Compulsory health declarations required for all passengers entering Vietnam from 06:00                                                                                                                                                           | Global                                        |
|  | March 15, 2020 | Suspension of visa issuance                                                                                                                                                                                                                      | UK, EU                                        |
|  | March 18, 2020 | Suspension of visa issuance to all foreigners for 30 days                                                                                                                                                                                        | Global                                        |
|  | March 21, 2020 | Mandatory 14-day quarantine at centralized facilities for all arriving travelers, regardless of origin; by this date, nearly 300 000 VNmese citizens have returned from abroad, 100 000 from COVID-19 affected areas                             | Global                                        |
|  | March 21, 2020 | Vietnam Airlines suspends routes                                                                                                                                                                                                                 | Singapore, Thailand, Indonesia, Laos, Myanmar |
|  | March 22, 2020 | Suspension of entry to all foreigners (except for diplomatic and official purposes); drastic cuts to incoming flights to avoid overloading the quarantine system                                                                                 | Global                                        |
|  | March 23, 2020 | Vietnam Airlines suspends routes                                                                                                                                                                                                                 | UK, Japan                                     |
|  | March 27, 2020 | All individuals entering the country from March 8 onward required to declare and update their health status to aid surveillance; strict control of all entrants by road, by sea and by air, especially the shared borders with Laos and Cambodia | Global, Cambodia and Laos                     |
|  | April 1, 2020  | Closure of main and auxiliary border gates                                                                                                                                                                                                       | Cambodia and Laos                             |

### Internal control measures

| Phase | Date                          | Event                                                                                                                                                                                                                                                                                                                                                                                                                              |
|-------|-------------------------------|------------------------------------------------------------------------------------------------------------------------------------------------------------------------------------------------------------------------------------------------------------------------------------------------------------------------------------------------------------------------------------------------------------------------------------|
|       | January 20, 2020              | 22 hospitals chosen for the treatment of suspected cases of nCoV                                                                                                                                                                                                                                                                                                                                                                   |
|       | January 22, 2020              | Monitoring of body temperature and health status at border gates, health facilities, and in communities, especially for passengers on arrival from Wuhan City, Hubei Province, China, and the affected region; early detection, isolation and timely handling of suspected cases of disease, preventing the disease from spreading to the community; monitor of all people exposed to a case within 14 days from the last exposure |
|       | January 30 to May 4, 2020     | All schools and universities closed following lunar New Year holiday                                                                                                                                                                                                                                                                                                                                                               |
|       | Late January - early February | Field hospitals and quarantine centers established in major cities and near border crossings                                                                                                                                                                                                                                                                                                                                       |
|       | February 2, 2020              | MoH calls for review and standardization of nCoV testing                                                                                                                                                                                                                                                                                                                                                                           |
|       | February 6, 2020              | Announcement that the Vietnam Social Insurance (VSI) health fund will cover 2019-nCoV tests and related treatment.                                                                                                                                                                                                                                                                                                                 |
|       | February 12, 2020             | Commune of 10 600 people in isolation after at least 10 cases of the novel coronavirus have been confirmed in Vinh Phuc province, north of Hanoi                                                                                                                                                                                                                                                                                   |
|       | February 16, 2020             | Joint effort to accelerate domestic production and supply of medical masks, protective uniforms and preventive medical supplies                                                                                                                                                                                                                                                                                                    |
|       | March 10, 2020                | Nationwide Vietnam Health Declaration must be completed for all citizens and foreigners in the country                                                                                                                                                                                                                                                                                                                             |

|  |                            |                                                                                                                                                                                                                                                                                                                                                                                                                                                                                                                                                                    |
|--|----------------------------|--------------------------------------------------------------------------------------------------------------------------------------------------------------------------------------------------------------------------------------------------------------------------------------------------------------------------------------------------------------------------------------------------------------------------------------------------------------------------------------------------------------------------------------------------------------------|
|  | March 13, 2020             | Non-emergency travel abroad discouraged, domestic travel by groups to be limited in quantity, time, and activities while traveling                                                                                                                                                                                                                                                                                                                                                                                                                                 |
|  | March 14, 2020             | Verification of citizens of European countries entering Vietnam within the previous 14 days (from 13/3/2020 and earlier), request of compulsory electronic health declaration if declaration was not made upon entry into Vietnam                                                                                                                                                                                                                                                                                                                                  |
|  | March 16, 2020             | Enforcement of mask wearing at public places with possible crowds such as supermarkets, airports, stations, public transportation, etc.                                                                                                                                                                                                                                                                                                                                                                                                                            |
|  | March 20, 2020             | Crowds over 50 people discouraged; entertainment services closed                                                                                                                                                                                                                                                                                                                                                                                                                                                                                                   |
|  | March 21, 2020             | Mandatory Health Declaration required for passengers on domestic flights and trains; suspension of in-person religious services                                                                                                                                                                                                                                                                                                                                                                                                                                    |
|  | March 24 to April 23, 2020 | HCMC: Ho Chi Minh City People's Committee issues a document to suspend operation of amusement parks, restaurants and beer clubs; catering businesses (with a capacity of 30 people or more), billiard clubs, gyms, spas, hair salons                                                                                                                                                                                                                                                                                                                               |
|  | March 28, 2020             | Medical isolation measures required for all medical personnel interacting with COVID-19 patients and their family members; 14-day isolation, starting from 00:00 on March 28, 2020 to 00:00 on April 11, 2020                                                                                                                                                                                                                                                                                                                                                      |
|  | March 28 - April 15, 2020  | Drastic reduction in domestic flights, decreasing total number of seats on flights by 90%                                                                                                                                                                                                                                                                                                                                                                                                                                                                          |
|  | March 28, 2020             | Gatherings of >20 people strongly discouraged; gatherings of >10 people or more outside the workplace, school, hospital prohibited; individuals must maintain a minimum distance of 2m in public places; provincial/city governments determine essential businesses that may remain open; temporary suspension or reorganization of public transport activities to restrict travel and social contact                                                                                                                                                              |
|  | April 1, 2020              | Declaration of COVID-19 epidemic in Vietnam                                                                                                                                                                                                                                                                                                                                                                                                                                                                                                                        |
|  | April 1 to April 22, 2020  | Implementation of social isolation for 15 days (extended) on a national scale according to the principle that families are separated from families, villages from villages, communes from communes, districts from districts and provinces from provinces. Country-wide lockdown implemented, including closure of all shops except those selling food, medications and fuel; mandatory mask-wearing in public; banning of public gatherings of >2 people; non-essential movement outside of residence discouraged; public transportation and taxi services halted |
|  | April 16 to April 22, 2020 | Gradual increase in domestic flights                                                                                                                                                                                                                                                                                                                                                                                                                                                                                                                               |
|  | April 23, 2020             | Lockdown measures relaxed, some non-essential businesses such as bars, spas, karaoke bars, and massage parlors remain closed; increased frequency of domestic flights                                                                                                                                                                                                                                                                                                                                                                                              |
|  | May 4 to May 11, 2020      | Staggered reopening of schools and universities                                                                                                                                                                                                                                                                                                                                                                                                                                                                                                                    |

### Ministry of Health-led Communications

| Phase | Date                   | Event                                                                                                                                                                                                                                                                                                                                                                                                                                                                                  | Responsible party                                             |
|-------|------------------------|----------------------------------------------------------------------------------------------------------------------------------------------------------------------------------------------------------------------------------------------------------------------------------------------------------------------------------------------------------------------------------------------------------------------------------------------------------------------------------------|---------------------------------------------------------------|
|       | January 9, 2020 onward | Dissemination of information to people, communities and healthcare workers, advising people on the disease situation in China and to maintain calm and proactively prevent winter-spring epidemic diseases according to the recommendations of the Ministry of Health. Promotion of disease surveillance at border gates, monitoring of patients with unexplained severe pneumonia at health care facilities, paying special attention to cases with history related to epidemic areas | Public Health Emergency Response Center, various news outlets |

|  |                   |                                                                                                                                                                                                                                                                                                                                                                                                                                                                                                                                         |                                                    |
|--|-------------------|-----------------------------------------------------------------------------------------------------------------------------------------------------------------------------------------------------------------------------------------------------------------------------------------------------------------------------------------------------------------------------------------------------------------------------------------------------------------------------------------------------------------------------------------|----------------------------------------------------|
|  | January 20, 2020  | Updated information to be provided every 2 hours on <a href="http://ncov.moh.gov.vn">ncov.moh.gov.vn</a> and <a href="http://ncov.vncdc.gov.vn">ncov.vncdc.gov.vn</a>                                                                                                                                                                                                                                                                                                                                                                   | MoH and Department of Preventive Medicine websites |
|  | January 27, 2020  | Telephone hotline number announced to receive information and opinions on the epidemic situation at the nationwide level and to advise on personal disease prevention                                                                                                                                                                                                                                                                                                                                                                   | Various news outlets, government websites          |
|  | February 2, 2020  | Technology-based communication plan established to inform population: SMS to all mobile subscribers; videos and infographics disseminated through mass media and on social networks and digital platforms such as Facebook, Zalo, YouTube, Lotus, etc.; uniform use of hashtag <b>#ICT_anti_nCoV</b>                                                                                                                                                                                                                                    | Government-wide                                    |
|  | February 3, 2020  | Those in contact with infected/suspected COVID-19 case must notify health authorities, wear a mask, and limit contact with others. All people should wash hands and other items often with soap, wear masks in public places and on public transport. Travel to China restricted. MoH web portal established for population monitoring                                                                                                                                                                                                  | MoH SMS                                            |
|  | February 4, 2020  | Encourage nationwide efforts against nCoV to comply with regulations and recommendations of the health sector. Discourage the distribution of false information and profiteering                                                                                                                                                                                                                                                                                                                                                        | MoH SMS                                            |
|  | February 5, 2020  | Refocusing of communications on disease prevention, guidance on community sanitation, public places, experience on epidemic prevention of previous epidemics, setting good examples, good work in epidemic prevention, silent sacrifices of health workers, individual roles and responsibilities in preventing disease in the community; reduce focus on warnings about disease risk and avoiding sensational news                                                                                                                     | National Steering Committee decision               |
|  | February 6, 2020  | Recommendation for use of medical masks when in contact with an infected/suspected nCoV case or someone with symptoms of respiratory disease, self-monitoring and isolation at home. Encourage the use of cloth masks for all healthy individuals when in crowded areas or on public transport. Reminder that hands washing and personal hygiene remain important measures to prevent the spread of disease                                                                                                                             | MoH SMS                                            |
|  | February 8, 2020  | <a href="#">Vietnam Health App</a> and website launched by MoH to provide information on COVID-19 and disease prevention, aiming to provide accurate, comprehensive, diverse and supportive information sources for the people, as well as healthcare workers                                                                                                                                                                                                                                                                           | Various news outlets, government websites          |
|  | February 11, 2020 | Encourage hand washing with soap and use of alcohol-based hand sanitizers when soap and water are not available                                                                                                                                                                                                                                                                                                                                                                                                                         | MoH SMS                                            |
|  | February 13, 2020 | Guidance on medical isolation at home and in places of residence provided from <a href="http://vncdc.gov.vn">vncdc.gov.vn</a>                                                                                                                                                                                                                                                                                                                                                                                                           | MoH SMS                                            |
|  | February 14, 2020 | Develop notice of the 14-day isolation period with COVID-19 (nCoV); messages on treatment hierarchy for COVID-19 (nCoV); coordinate with Vietnam Television (VTV) to prepare programs on "World Panorama"                                                                                                                                                                                                                                                                                                                               | MoH decision                                       |
|  | February 14, 2020 | Release of an iOS and Android app for health information about nCoV                                                                                                                                                                                                                                                                                                                                                                                                                                                                     | MoH SMS                                            |
|  | February 19, 2020 | Encourage people with signs of COVID-19 acute respiratory infection: fever, cough, shortness of breath and close contact with case or suspicion of infection to contact appropriate medical facilities, provide medical and contact histories, and go to the nearest district hospital for examination and treatment if indicated by authorities. Reminder that the rapid response teams of the Ministry of Health are always available, supporting district hospitals in the work of examination, diagnosis and treatment for patients | MoH SMS                                            |
|  | February 23, 2020 | Release of pop song, <a href="#">Ghen Cô Vy</a> (English: Jealous Coronavirus), to promote handwashing, social distancing, not touching one's face, and keeping their surroundings clean                                                                                                                                                                                                                                                                                                                                                | MoH and Vietnam                                    |

|  |                     |                                                                                                                                                                                                                                                                                                                                                                                                                                                                                                                                        |                                                                       |
|--|---------------------|----------------------------------------------------------------------------------------------------------------------------------------------------------------------------------------------------------------------------------------------------------------------------------------------------------------------------------------------------------------------------------------------------------------------------------------------------------------------------------------------------------------------------------------|-----------------------------------------------------------------------|
|  |                     |                                                                                                                                                                                                                                                                                                                                                                                                                                                                                                                                        | National Institute of Occupational and Environmental Health (VNNIOSH) |
|  | February 26, 2020   | Recommendation issued for prevention and control of COVID-19 (nCoV) for trade centers, supermarkets, markets, restaurants, hotels, parks and tourist areas                                                                                                                                                                                                                                                                                                                                                                             | MoH recommendation                                                    |
|  | March to April 2020 | Regular assurances of availability of food, medicines and other necessities, recommendations for online shopping to limit crowding in public places, requests to fill out universal health declarations, denial of unfounded rumors, communication of regulations on public gatherings, mask wearing, and unnecessary travel                                                                                                                                                                                                           | SMS messages from local government authorities                        |
|  | March 2, 2020       | MoH coordinates with Vietnam Television (VTV 24) to develop a health news and broadcast at 11:30 noon daily on the situation of COVID-19 epidemic on VTV1                                                                                                                                                                                                                                                                                                                                                                              | MoH decision                                                          |
|  | March 7, 2020       | When entering Vietnam, an accurate and truthful medical declaration must be provided, either at the border gate or online from <a href="http://suckhoetoandan.vn">suckhoetoandan.vn</a>                                                                                                                                                                                                                                                                                                                                                | MoH SMS                                                               |
|  | March 8, 2020       | Indication of monitoring of cases and contacts, discouraging overreaction while safely implementing MoH guidelines for hygiene and safety                                                                                                                                                                                                                                                                                                                                                                                              | MoH SMS                                                               |
|  | March 9, 2020       | Encourage hand washing and proper hygiene, limiting contact with those who are ill, proper mask wearing                                                                                                                                                                                                                                                                                                                                                                                                                                | MoH SMS                                                               |
|  | March 10, 2020      | Personal hygiene recommendations                                                                                                                                                                                                                                                                                                                                                                                                                                                                                                       | MoH SMS                                                               |
|  | March 12, 2020      | Encourage those with signs of COVID-19 acute respiratory infection: fever, cough, shortness of breath and close contact with case or suspicion of infection to contact appropriate medical facilities, provide medical and contact histories, and go to the nearest district hospital for examination and treatment if indicated by authorities. Reminder that the rapid response teams of the Ministry of Health are always available, supporting district hospitals in the work of examination, diagnosis and treatment for patients | MoH SMS                                                               |
|  | March 13, 2020      | Guidelines for isolation at home provided at <a href="http://ncov.moh.gov.vn">ncov.moh.gov.vn</a>                                                                                                                                                                                                                                                                                                                                                                                                                                      | MoH SMS                                                               |
|  | March 14, 2020      | Reminder of the MoH telephone hotline and Vietnam Health app for up-to-date information on the COVID-19 epidemic                                                                                                                                                                                                                                                                                                                                                                                                                       | MoH SMS                                                               |
|  | March 19, 2020      | Mandatory use of the <a href="#">Hanoi Smart City app</a> to monitor the health and movement of recovered confirmed cases, suspected cases, and people under quarantine                                                                                                                                                                                                                                                                                                                                                                | Various news outlets, government websites                             |
|  | March 22, 2020      | Instructions for all individuals entering Vietnam from 1 March 2020 to make an online medical declaration, self-separate at home (if not yet in quarantine) for 14 days after return to Vietnam. Reminder for all to wear a mask and wash hands frequently                                                                                                                                                                                                                                                                             | MoH SMS                                                               |
|  | March 22, 2020      | Recommendation that people over 60 stay at home and limit contact with others. Recommendation that everyone wear a mask when outside of the home and practice good hygiene                                                                                                                                                                                                                                                                                                                                                             | Office of the Prime Minister SMS                                      |
|  | March 29, 2020      | Strong recommendations on mask wearing, hygiene, minimization of travel and social contact                                                                                                                                                                                                                                                                                                                                                                                                                                             | MoH SMS                                                               |
|  | March 31, 2020      | Strong recommendations on mask wearing, hygiene, minimization of travel and social contact; reminder of mandatory medical declarations on NCOVI application <a href="#">NCOVI application</a>                                                                                                                                                                                                                                                                                                                                          | MoH SMS                                                               |



|  |                |                                                                                                                                                                                                                |                                                    |
|--|----------------|----------------------------------------------------------------------------------------------------------------------------------------------------------------------------------------------------------------|----------------------------------------------------|
|  | April 18, 2020 | Release of <a href="#">Bluezone mobile application</a> that uses BLE low-power Bluetooth positioning technology to identify and track and communicate with F1 and F2 contacts when positive cases are detected | MoH and Ministry of Information and Communications |
|--|----------------|----------------------------------------------------------------------------------------------------------------------------------------------------------------------------------------------------------------|----------------------------------------------------|

### Testing capacity

| Phase | Date              | Cumulative number of PCR tests administered | Total number of testing sites nationwide |
|-------|-------------------|---------------------------------------------|------------------------------------------|
|       | January 23, 2020  | 10                                          | 2                                        |
|       | February 1, 2020  | 237                                         | 5                                        |
|       | February 16, 2020 | 984                                         | 6                                        |
|       | March 1, 2020     | 2,370                                       | 8                                        |
|       | March 16, 2020    | 14,291                                      | 16                                       |
|       | April 1, 2020     | 83,194                                      | 38                                       |
|       | April 16, 2020    | 206,464                                     | 52                                       |
|       | May 1, 2020       | 266,122                                     | 63                                       |

**Table S2. Analysis of deviance table (type-II tests) for Figure 3B explaining the duration of hospitalization with a gamma regression.** LR Chisq: chi-squared statistic, Df: degrees of freedom, Pr(>Chisq): p-value of the type-II likelihood ratio test.

|              | LR Chisq | Df | Pr(>Chisq) |
|--------------|----------|----|------------|
| asymptomatic | 18.9059  | 1  | < 0.0001   |
| age          | 1.4677   | 1  | 0.2257     |
| imported     | 0.4023   | 1  | 0.5259     |
| gender       | 0.0530   | 1  | 0.8180     |
| nationality  | 2.4260   | 1  | 0.1193     |

**Table S3. Analysis of deviance table (type-II tests) for Figure 3C explaining the proportion asymptomatic with a logistic regression.** LR Chisq: chi-squared statistic, Df: degrees of freedom, Pr(>Chisq): p-value of the type-II likelihood ratio test.

|             | LR Chisq | Df | Pr(>Chisq) |
|-------------|----------|----|------------|
| age         | 0.1999   | 1  | 0.6548     |
| imported    | 3.0757   | 1  | 0.0795     |
| gender      | 0.0915   | 1  | 0.7623     |
| nationality | 0.3049   | 1  | 0.5808     |

**Table S4. Contingency table of the number of symptomatic and imported cases.** The total number of cases is 270.

|              | imported | locally transmitted | totals |
|--------------|----------|---------------------|--------|
| asymptomatic | 71       | 49                  | 120    |
| symptomatic  | 92       | 58                  | 150    |
| totals       | 163      | 107                 | 270    |

#### 4. References

- 1 Apple LLC. Apple COVID-19 Reports on Mobility Trends. <https://www.apple.com/covid19/mobility> (accessed May 7, 2020).
- 2 Google LLC. Google COVID-19 Community Mobility Reports. <https://www.google.com/covid19/mobility/> (accessed May 7, 2020).
- 3 R Core Team. R: A Language and Environment for Statistical Computing. Vienna, Austria: R Foundation for Statistical Computing, 2020 <https://www.R-project.org/>.
- 4 Delignette-Muller ML, Dutang C. fitdistrplus: An R Package for Fitting Distributions. *Journal of Statistical Software* 2015; **64**: 1–34.
- 5 Genz A, Bretz F, Miwa T, *et al.* mvtnorm: Multivariate Normal and t Distributions. 2020 <https://CRAN.R-project.org/package=mvtnorm>.
- 6 Fox J, Weisberg S. An R Companion to Applied Regression, Third. Thousand Oaks CA: Sage, 2019 <https://socialsciences.mcmaster.ca/jfox/Books/Companion/>.
- 7 Kamvar ZN, Cai J, Pulliam JRC, Schumacher J, Jombart T. Epidemic curves made easy using the R

package incidence [version 1; referees: awaiting peer review]. *F1000Research* 2019; **8**.  
<https://doi.org/10.12688/f1000research.18002.1>.

8 Cori A. EpiEstim: Estimate Time Varying Reproduction Numbers from Epidemic Curves. 2019  
<https://CRAN.R-project.org/package=EpiEstim>.
